# Supplementary material
Source: Springer Nature journal article supplement (https://www.springermedizin.de/resource/supplementary/12939_2010_210_MOESM3_ESM.pdf/9550606)

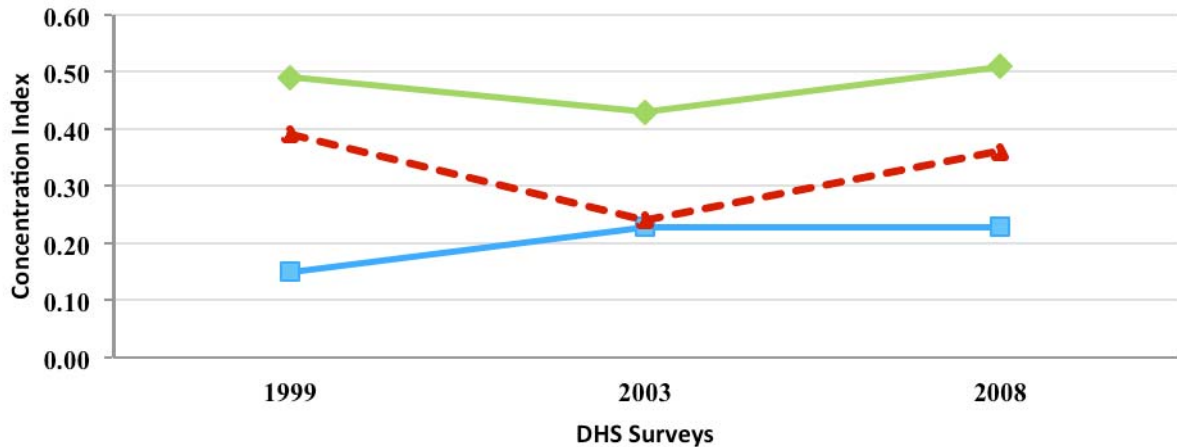

—◆— Actual

—■— Need predicted

- -▲- - Need standardized

Supplement: MOESM3 [file 9550606]
